# Supplementary material for: Body mass index in school-aged children and the risk of routinely diagnosed non-alcoholic fatty liver disease in adulthood: a prospective study based on the Copenhagen School Health Records Register
Source: HighWire-hosted journal article supplement (doi:10.1136/bmjopen-2014-006998), 2015-05-01
Supplement: bmjopen-2014-006998supp.pdf [file bmjopen-2014-006998supp.pdf]

**Appendix 1: Diagnosis codes for NAFLD and for the exclusion diagnosis of alcohol-related diseases, viral and autoimmune hepatitis, and biliary cirrhosis from the different Danish Registers**

**Table 1A. NAFLD diagnosis**

| <b>Register</b>            | <b>The National Patient Register</b>                                                                                                                                   |
|----------------------------|------------------------------------------------------------------------------------------------------------------------------------------------------------------------|
| <b>Diagnostic category</b> | <b>ICD 8/10 codes</b>                                                                                                                                                  |
| NA Steatosis               | 571.11, 571.19/K76.0                                                                                                                                                   |
| NA Steatohepatitis         | 570.00, 570.01, 570.08, 570.09, 573.03/K73.0, K73.1, K73.2, K73.8, K73.9                                                                                               |
| NA Fibrosis                | 573.04/K74.0, K74.1, K74.2                                                                                                                                             |
| NA Cirrhosis               | 571.92, 571.99/K74.6                                                                                                                                                   |
|                            |                                                                                                                                                                        |
| <b>Register</b>            | <b>The National Register of Pathology</b>                                                                                                                              |
| <b>Diagnostic category</b> | <b>SNOMED codes</b>                                                                                                                                                    |
|                            |                                                                                                                                                                        |
| NA Steatosis               | M50000, M50080, M50085, M50086, M55200, M55280, M71800                                                                                                                 |
| NA Steatohepatitis         | M40000, M41000, M42000, M42100, M43000, M43005, M43006, M45000, M50070, M50110, M50130, M51620, M51630, M54000, M54001, M54003, M54070, M54120, M66080, M66160, M45400 |
| NA Fibrosis                | M49000, M49231, M49232, M49620, MYY493 = M49231<br>MYY494 = M49232                                                                                                     |
| NA Cirrhosis               | M49500, M49501, M49503, M49504, M49505, M49506, M49510, M49514, M49516, M49520, M49524, M49526, M49527, M49528, M49530,                                                |

**Table 1B. Alcohol-related and viral or biliary liver disease diagnosis**

| <b>Register</b>                        | <b>The National Patient Register and the National Register of Pathology</b>                                                                                                                          |
|----------------------------------------|------------------------------------------------------------------------------------------------------------------------------------------------------------------------------------------------------|
| <b>Diagnostic category</b>             | <b>ICD 8/10 codes and SNOMED codes</b>                                                                                                                                                               |
| <b>Viral and auto-immune hepatitis</b> | 070.xx/B15-B19<br>S052, S63580                                                                                                                                                                       |
| <b>Biliary liver diseases</b>          | 571.90, 571.91/K74.3, K74.4<br>M4958, M4959                                                                                                                                                          |
|                                        |                                                                                                                                                                                                      |
| <b>Registers</b>                       | <b>The National Patient Register, the National Psychiatric Central Register and the National Register of Pathology</b>                                                                               |
| <b>Alcohol-related diseases</b>        | 291.xx, 303.xx, 571.09, 571.10, 577.10/F10.x, F10.0, F10.1, F10.3, F10.4, F10.5, F10.6, F10.7, F10.8, F10.9, G62.1, K70.x, K70.0, K70.1, K70.2, K70.3, K70.4, K70.9, K86.0<br>M49660, S63590, S87720 |

**Supplementary Table 1. Hazard ratios and 95% CI according to one unit change in BMI z-scores between 7 through 13 years, adjusted for BMI 7 and BMI 13, respectively, in relation to clinically recognized non-alcoholic steatosis, steatohepatitis, fibrosis and cirrhosis in adulthood in a cohort of 244,464 children**

|                         | <i>Boys</i> |                | <i>Girls</i> |                |
|-------------------------|-------------|----------------|--------------|----------------|
|                         | <b>HR</b>   | <b>95 % CI</b> | <b>HR</b>    | <b>95 % CI</b> |
| <b>Steatosis</b>        |             |                |              |                |
| Change*                 | 1.28        | 1.26-1.46      | 1.12         | 0.99-1.28      |
| BMI 7 below the median  | 1.06        | 0.91-1.24      | 0.86         | 0.72-1.02      |
| BMI 7 above the median  | 1.10        | 0.92-1.31      | 1.05         | 0.90-1.25      |
| Change**                | 1.27        | 1.12-1.44      | 1.01         | 0.90-1.15      |
| BMI 13 below the median | 1.10        | 0.92-1.31      | 1.04         | 0.87-1.25      |
| BMI 13 above the median | 1.11        | 0.94-1.32      | 1.25         | 1.07-1.46      |
| <b>Steatohepatitis</b>  |             |                |              |                |
| Change*                 | 1.05        | 0.90-1.23      | 1.16         | 0.99-1.37      |
| BMI 7 below the median  | 1.10        | 0.91-1.32      | 0.85         | 0.69-1.05      |
| BMI 7 above the median  | 1.12        | 0.91-1.37      | 0.92         | 0.73-1.46      |
| Change**                | 1.05        | 0.90-1.22      | 1.11         | 0.95-1.30      |
| BMI 13 below the median | 1.10        | 0.90-1.34      | 0.89         | 0.71-1.13      |
| BMI 13 above the median | 1.10        | 0.90-1.35      | 0.98         | 0.80-1.21      |
| <b>Fibrosis</b>         |             |                |              |                |
| Change*                 | 1.17        | 0.92-1.48      | 1.16         | 0.90-1.50      |
| BMI 7 below the median  | 1.01        | 0.76-1.32      | 0.76         | 0.54-1.09      |
| BMI 7 above the median  | 0.99        | 0.71-1.38      | 0.96         | 0.67-1.37      |
| Change**                | 1.17        | 0.94-1.47      | 1.04         | 0.81-1.33      |
| BMI 13 below the median | 1.06        | 0.78-1.44      | 0.95         | 0.65-1.37      |
| BMI 13 above the median | 1.05        | 0.77-1.44      | 1.17         | 0.85-1.61      |
| <b>Cirrhosis</b>        |             |                |              |                |
| Change*                 | 1.07        | 0.93-1.23      | 1.10         | 0.93-1.30      |
| BMI 7 below the median  | 1.15        | 0.98-1.34      | 1.00         | 0.81-1.24      |
| BMI 7 above the median  | 0.99        | 0.81-1.20      | 1.18         | 0.95-1.45      |
| Change**                | 1.16        | 1.02-1.33      | 1.02         | 0.87-1.19      |
| BMI 13 below the median | 1.11        | 0.93-1.32      | 0.89         | 0.70-1.14      |
| BMI 13 above the median | 0.94        | 0.77-1.14      | 1.05         | 0.85-1.30      |

The hazard ratios of BMI 7 and 13 years, respectively, illustrate the risk associated with each 1-unit difference in BMI z-score away from zero. E.g. a HR of 1.06 (CI 0.91-1.24) in 7 year old boys with a BMI z-score below the median means that the risk of adult steatosis increases with 6% per 1-unit *lower* BMI z-score below zero. A HR of 1.25 (CI 1.07-1.46) in 13 year old girls with a BMI z-score above the median means that the risk of adult steatosis increases with 25% per 1-unit *higher* BMI z-score above zero.

\*Adjusted for BMI z-score at age 7 years

\*\* Adjusted for BMI z-score at age 13 years

**Supplementary Table 2. Hazard ratios and 95% CI according to one unit change in BMI z-scores between 7 through 13 years, adjusted for BMI 7 and BMI 13, respectively, in relation to clinically recognized NAFLD in adulthood in a cohort of 231,664 children with follow-up starting in 1994**

|                         | <i>Boys</i> |                | <i>Girls</i> |                |
|-------------------------|-------------|----------------|--------------|----------------|
|                         | <b>HR</b>   | <b>95 % CI</b> | <b>HR</b>    | <b>95 % CI</b> |
| <b>NAFLD</b>            |             |                |              |                |
| Change*                 | 1.21        | 1.08-1.37      | 1.25         | 1.11-1.40      |
| BMI 7 below the median  | 1.02        | 0.89-1.18      | 0.91         | 0.79-1.06      |
| BMI 7 above the median  | 1.17        | 1.00-1.36      | 1.11         | 0.95-1.29      |
| Change**                | 1.14        | 1.02-1.28      | 1.13         | 1.02-1.27      |
| BMI 13 below the median | 0.97        | 0.83-1.15      | 0.95         | 0.81-1.13      |
| BMI 13 above the median | 1.10        | 0.94-1.28      | 1.14         | 0.99-1.31      |

This analysis is based on 231,664 individuals of whom 1,514 were diagnosed with NAFLD during the follow-up period from 1994 to 2010. The hazard ratios of BMI 7 and 13 years, respectively, illustrate the risk associated with each 1-unit difference in BMI z-score away from zero. E.g. a HR of 1.02 (CI 0.89-1.18) in 7 year old boys with a BMI z-score below the median means that the risk of adult NAFLD increases with 2% per 1-unit *lower* BMI z-score below zero. A HR of 1.14 (CI 0.99-1.31) in 13 year old girls with a BMI z-score above the median means that the risk of adult NAFLD increases with 14% per 1-unit *higher* BMI z-score above zero.

\*Adjusted for BMI z-score at age 7 years

\*\* Adjusted for BMI z-score at age 13 years

**Supplementary Figure 1. Hazard ratios and 95% CI according to change in BMI z-score between the ages of 7 and 13 years, adjusted for BMI z-score at 7 years of age, in relation to clinically recognized NAFLD in adulthood for (A) boys and (B) girls free of any alcohol-related diagnosis**

**(A) Boys**

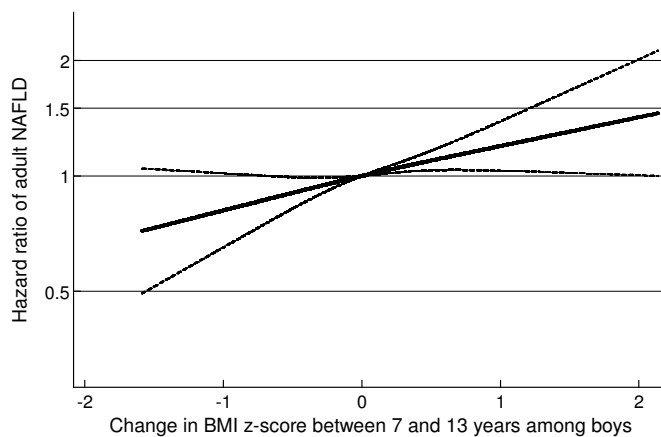

HR of adult NAFLD per 1-unit increase in BMI z-score between 7 and 13 years of age among boys:  
1.19 (95% CI: 1.07-1.32)

**(B) Girls**

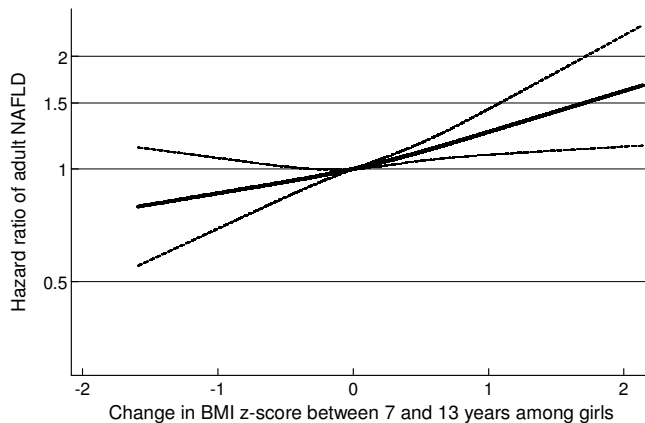

HR of adult NAFLD per 1-unit increase in BMI z-score between 7 and 13 years of age among girls:  
1.19 (95% CI: 1.08-1.32)

The associations are adjusted for BMI z-score at 7 years of age and stratified by birth cohort. The hazard ratios in Supplementary Figure 1 are estimated by Cox regression including change in body mass index (BMI) z-score between the ages of 7 and 13 years, as a restricted cubic spline with 3 knot points located at the 10<sup>th</sup>, 50<sup>th</sup> and 90<sup>th</sup> percentile, with a reference point in change in BMI z-score equal to 0, and truncated to depict the inner 99% part of the distribution. There was no interaction between the change and initial BMI ( $p > 0.05$  in both boys and girls).

Abbreviations: BMI: body mass index; NAFLD: Non-alcoholic fatty liver disease

**Supplementary Figure 2. Hazard ratios and 95% CI according to change in BMI z-score between the ages of 7 and 13 years, adjusted for BMI z-score at 13 years, in relation to clinically recognized NAFLD in adulthood for (A) boys and (B) girls free of any alcohol-related diagnosis**

**(A) Boys**

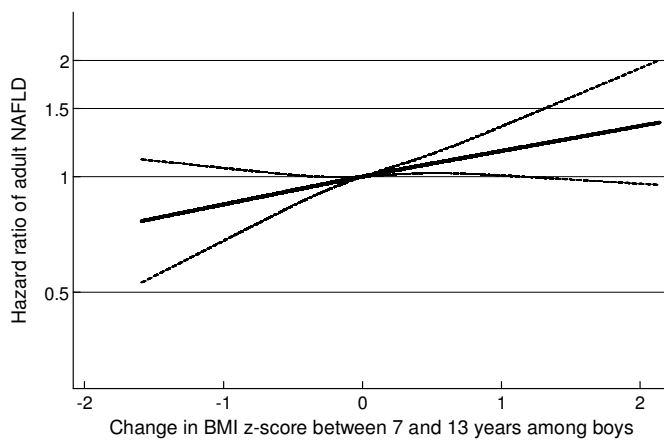

HR of adult NAFLD per 1-unit increase in BMI z-score between 7 and 13 years of age among boys:  
1.15 (95% CI: 1.04-1.27)

**(B) Girls**

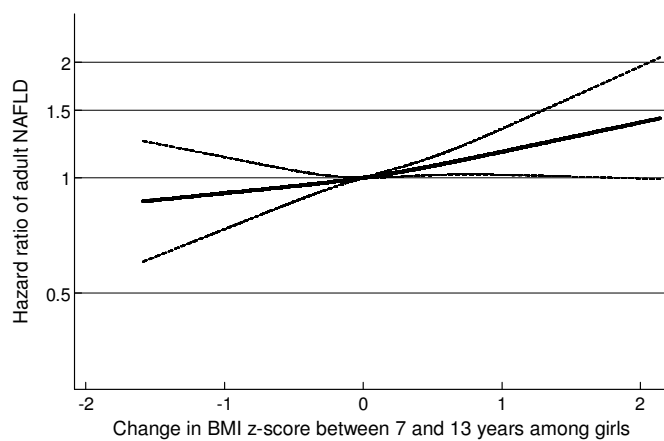

HR of adult NAFLD per 1-unit increase in BMI z-score between 7 and 13 years of age among girls:  
1.11 (95% CI: 1.01-1.23)

The associations are adjusted for BMI z-score at 13 years of age and stratified by birth cohort. The hazard ratios in Supplementary Figure 2 are estimated by Cox regression including change in body mass index (BMI) z-score between the ages of 7 and 13 years, as a restricted cubic spline with 3 knot points located at the 10<sup>th</sup>, 50<sup>th</sup> and 90<sup>th</sup>

percentile, with a reference point in change in BMI z-score equal to 0, and truncated to depict the inner 99% part of the distribution.

Abbreviations: BMI: body mass index; NAFLD: Non-alcoholic fatty liver disease
